# Supplementary material for: Differential Expression of the Androgen Receptor, Splice Variants and Relaxin 2 in Renal Cancer
Source: MDPI journal article supplement (doi:10.3390/life11080731), 2021-07-22
Supplement: s1 [file s1]

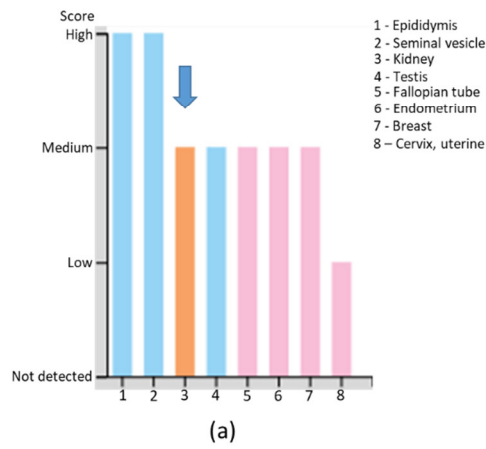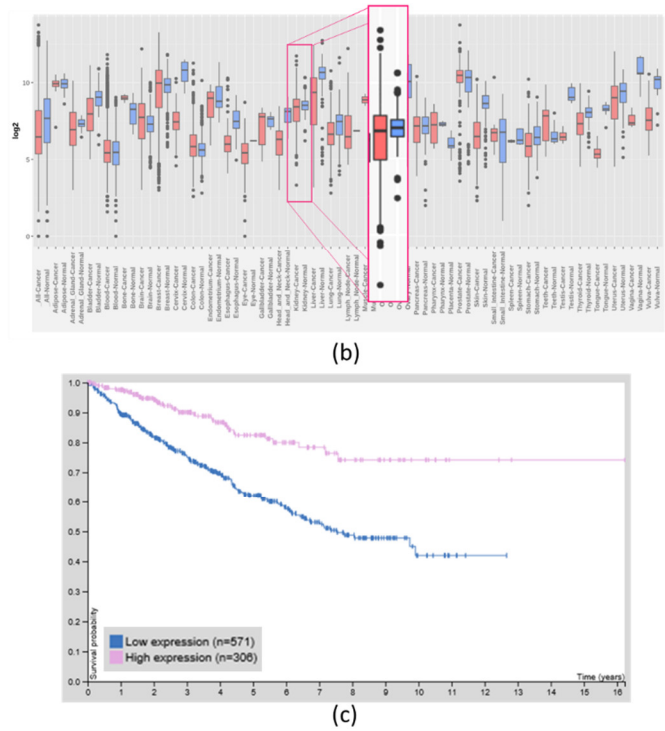

**Figure S1.** Summary of online databasis analysis. (a) Expression of AR protein in kidney (3; orange) (<https://www.proteinatlas.org/>), (b) Expression of AR in normal and tumor tissues (<http://gent2.appex.kr/gent2/>), (c) Survival probability of RCC patients with low and high expression of AR.
